# Supplementary material
Source: PubMed Central journal article supplement (PMC6648788)
Supplement: ao9b00460_si_001.pdf [file ao9b00460_si_001.pdf]

# Protein Corona over Mesoporous Silica Nanoparticles: Influence of the Pore Diameter on Competitive Adsorption and Application to Prostate Cancer Diagnostic

Carla Vidaurre-Agut,<sup>†,§</sup> Eva Rivero-Buceta,<sup>†</sup> Eva Romaní-Cubells,<sup>†</sup> Alden M. Clemments,<sup>||</sup> César David Vera-Donoso,<sup>⊥</sup> Christopher C. Landry,<sup>||,\*</sup> Pablo Botella<sup>†,\*</sup>

<sup>†</sup>Instituto de Tecnología Química, Universitat Politècnica de València-Consejo Superior de Investigaciones Científicas, Avenida de los Naranjos s/n, 46022 Valencia, Spain

<sup>§</sup>Instituto de Instrumentación para Imagen Molecular, Centro Mixto CSIC-Universitat Politècnica de València, Camino de Vera s/n, 46022 Valencia, Spain

<sup>||</sup>Department of Chemistry, University of Vermont, 82 University Place, Burlington, VT 05405, USA

<sup>⊥</sup>Department of Urology, Hospital Universitari i Politèmic La Fe, Av. Fernando Abril Martorell, 106, 46026 Valencia, Spain

|                                                                                                                                              |     |
|----------------------------------------------------------------------------------------------------------------------------------------------|-----|
| <u>1. Materials</u>                                                                                                                          | S2  |
| <b>Table of Contents</b>                                                                                                                     |     |
| <u>2. Synthesis &amp; Characterization of Nanoparticles</u>                                                                                  | S2  |
| <u>3. Supplementary Tables</u>                                                                                                               | S4  |
| <b>Table S1.</b> Protein adsorption onto silica nanoparticles from human serum as a function of pore diameter.                               | S4  |
| <b>Table S2.</b> Values of NSpC x TGA for all proteins found in protein corona analysis of silica nanoparticles with variable pore diameter. | S5  |
| <b>Table S3.</b> Values of NSpC x TGA for all proteins found in protein corona analysis of PCa patient serum samples.                        | S7  |
| <b>Table S4.</b> Observed up and down-regulated proteins with reported cancer biomarker potential.                                           | S11 |
| <u>4. Supplementary Figures</u>                                                                                                              | S12 |
| <b>Figure S1.</b> Particle hydrodynamic diameter of as-synthesized materials as determined in water by DLS.                                  | S12 |
| <b>Figure S2.</b> BET N <sub>2</sub> adsorption-desorption isotherms of as-synthesized materials.                                            | S12 |
| <b>Figure S3.</b> Pore size distribution in as-synthesized materials as determined by BJH method.                                            | S14 |

**Figure S4.** SDS-PAGE of isolated corona proteins from silica nanoparticles with variable pore diameter. S15

**Figure S5.** Comparison of the weight percent of the protein corona (NSpC x TGA) across the different surface modified MSN with respect to molecular weight (Mw). S16

**Figure S6.** Principal Component Analysis (PCA) representation of experimental data. S17

## 5. References

S18

## 1. Materials

All materials were purchased from Sigma Aldrich unless otherwise noted, and used as received.

## 2. Synthesis & Characterization of Nanoparticles

**Synthesis of Dense Silica Nanoparticles (SNP).** This synthesis was conducted by modifying the Stöber method.<sup>1</sup> EtOH (100%, 20 mL) was mixed with NH<sub>4</sub>OH (12.9 M, 1.5 mL) at room temperature in a 100 mL round-bottom flask equipped with a magnetic stir bar. This mixture was stirred briefly to equilibrate, and then tetraethyl orthosilicate (TEOS, 2 mL in 5 mL EtOH, 7 mL, 8.93 mmol) was added to the solution. The obtained gel was 1:2.24:4.70:45.5 SiO<sub>2</sub>/NH<sub>4</sub>OH/H<sub>2</sub>O/EtOH. This mixture was stirred for 1 h at room temperature. Afterwards, the precipitate was isolated by centrifugation (14 800 rpm, 5 min) and resuspended in EtOH. This process was repeated three times in order to remove as much unreacted reagent as possible. Finally, EtOH was removed and the obtained white powder was freeze-dried at -55 °C for 16 h.

**Synthesis of Medium Pore Silica Nanoparticles (MSN).** This protocol was adapted from a previous recipe.<sup>2</sup> Hexadecyltrimethylammonium bromide (CTAB, 1.00 g) was dissolved in 500 mL of NaOH 14 mM at 80 °C with strong stirring. Then, 5.0 mL of tetraethyl orthosilicate (TEOS) was dropped slowly. The obtained gel was 1:0.12:0.31:1245 SiO<sub>2</sub>/CTAB/NaOH/H<sub>2</sub>O. After 2 h the resulting mixture was cooled in ice, filtered off and washed with water and methanol. The solid was freeze-dried at -55 °C for 16 h.

**Synthesis of Large Pore Silica Nanoparticles (LPS).** According to our former work,<sup>3</sup> mesoporous silica nanoparticles with large pores were synthesized by using a block copolymer (Pluronic F127) and a fluorocarbon surfactant (FC-4, Yick-Vik) as internal and external templates, respectively. For the synthesis of LPS-1, 0.25 g of F127 and 0.70 g of FC-4 were dissolved in 30 mL of HCl aqueous solution (0.02 M), followed by the introduction of 0.20 g of 1,3,5-trimethylbenzene (TMB) into the solution. The mixture was stirred for 2h at 15 °C. Then, 1.50 g of tetraethyl orthosilicate (TEOS) was dropped slowly to the solution and stirred for 24 h at 10 °C. The molar ratio of the reactants was 1:0.0028:0.24:0.12:0.08:232 TEOS/F127/TMB/FC-4/HCl/H<sub>2</sub>O. The solution along with the precipitate was then introduced into an autoclave and hydrothermally treated at 135 °C for 24 h. The as-prepared product was filtered and washed first with water and subsequently with ethanol and dried in air. For the other LPS samples, the hydrothermal treatment was carried out at 150 °C, and after solid recovery a second hydrothermal treatment was carried out at 100 °C (LPS-2), 120 °C (LPS-3) or 150 °C (LPS-4). For this sake, 0.50 g of as-prepared product was added to a solution of 30 mL of HCl 2M in an autoclave,

and the mixture was heated at 140 °C for 48 h. Subsequently, template removal was done by microwave-assisted digestion. 0.40 g of the as-prepared sample was introduced into a Teflon vessel with 6 mL of HNO<sub>3</sub> (15 M) and 4 mL of H<sub>2</sub>O<sub>2</sub> (9 M), and the mixture was treated in a microwave oven MARS-5 at 800 W, 2245 MHz, and 220 V. The maximum temperature (150 °C) was held for 2 min. The solid was recovered by filtration, washed with water and ethanol, and finally dried overnight at room temperature under vacuum.

**Surface Modification of Nanoparticles.** MSN adsorption properties were modified by surface decoration with variable organic functionalities. Here, the incorporation of amine or carboxylate groups (respectively, MSN-NH<sub>2</sub> or MSN-COOH samples) was carried out by following methods reported elsewhere.<sup>4</sup> For preparation of thiol derivatized MSN (MSN-SH) 500 mg of particles MSN-OH were dried under vacuum with a temperature of 350 °C for 3 hours. Then 15 mL of anhydrous toluene was added under stirring at 120 °C and inert atmosphere. Finally 932 µL of (3-mercaptopropyl) trimethoxysilane were added and allowed to stir for 16 h. The solid obtained was filtered, washed with toluene and methanol and freeze-dried at -55 °C for 16 h.

**Nanoparticle Characterization.** Nanoparticle morphology and size were studied by transmission electron microscopy (TEM) in a JEOL JEM 2100F microscope operating at 200 kV. Samples were dispersed in isopropanol and transferred to carbon coated copper grids. Nitrogen gas adsorption isotherms were measured in a Micromeritics Flowsorb apparatus. Surface area calculations were carried out using the BET method, whereas pore size distribution was calculated according the BJH algorithm.<sup>5</sup> Particle size and Z-Potential measurements were conducted by diffuse light scattering (DLS) in a Zetasizer Nano ZS (Malvern Instruments Ltd., Worcestershire, UK). Dried materials were re-suspended in deionized water at a concentration of 5 µg/mL and measurements were performed at 25 °C. The mean hydrodynamic diameter was determined by cumulant analysis. Surface coverage of organic groups (R-NH<sub>2</sub>, R-COOH, R- and R-SH) was calculated from carbon elemental analysis determination (FISONS, EA 1108 CHNS-O). The organic content on the different samples before and after protein adsorption was quantified by thermogravimetric analysis in a Mettler-Toledo TGA/SDTA 851<sub>e</sub> apparatus.

### 3. Supplementary Tables

**Table S1.** Protein adsorption onto silica nanoparticles from human serum as a function of pore diameter. Values (mg/g SiO<sub>2</sub>) corresponding to the mean  $\pm$  standard deviation (SD) were calculated by multiplying the normalized spectral counts (NSpC) obtained from liquid chromatography tandem-mass spectrometry (LC-MS/MS) by the total mass of the protein corona (PC) obtained from thermogravimetric analysis (TGA).

| Proteomic Fraction (%) | Pore Diameter (nm) |                |                |                |                |                 |
|------------------------|--------------------|----------------|----------------|----------------|----------------|-----------------|
|                        | 0                  | 2.7            | 4.8            | 6.2            | 7.4            | 14.0            |
| Mw < 50 kDa            | 64.7 $\pm$ 8.8     | 84.9 $\pm$ 3.8 | 86.9 $\pm$ 4.0 | 84.8 $\pm$ 6.8 | 85.1 $\pm$ 5.0 | 79.9 $\pm$ 10.7 |
| Mw 50-70 kDa           | 28.9 $\pm$ 4.4     | 11.8 $\pm$ 1.1 | 9.2 $\pm$ 0.7  | 11.0 $\pm$ 0.7 | 11.6 $\pm$ 0.9 | 16.1 $\pm$ 1.6  |
| Mw 70-140 kDa          | 4.2 $\pm$ 0.6      | 2.1 $\pm$ 0.2  | 2.5 $\pm$ 0.2  | 2.5 $\pm$ 0.8  | 2.0 $\pm$ 0.2  | 1.9 $\pm$ 0.9   |
| Mw > 140 kDa           | 2.2 $\pm$ 0.6      | 1.1 $\pm$ 0.1  | 1.3 $\pm$ 0.4  | 1.7 $\pm$ 0.5  | 1.3 $\pm$ 0.1  | 2.1 $\pm$ 0.6   |

**Table S2.** Values of NSpC x TGA for all proteins found in protein corona analysis of silica nanoparticles with variable pore diameter. Total protein content determined by TGA is indicated at the end of the list for every sample. Data in mg/g.

| PROTEIN NAME                                                                                          | Mw     | SNP   | MSN    | LPS-1  | LPS-2  | LPS-3  | LPS-4  |
|-------------------------------------------------------------------------------------------------------|--------|-------|--------|--------|--------|--------|--------|
| Immunoglobulin lambda-like polypeptide 5 OS=Homo sapiens GN=IGLL5 PE=2 SV=2                           | 8.843  | 0.299 | 0.000  | 1.717  | 0.000  | 0.000  | 0.000  |
| Apolipoprotein C-I OS=Homo sapiens GN=APOC1 PE=1 SV=1                                                 | 9.332  | 0.590 | 16.978 | 18.864 | 14.965 | 12.733 | 3.552  |
| Neutrophil defensin 3 OS=Homo sapiens GN=DEFA3 PE=1 SV=1                                              | 10.245 | 0.000 | 0.000  | 0.016  | 0.014  | 0.000  | 0.000  |
| Platelet factor 4 OS=Homo sapiens GN=PF4 PE=1 SV=2                                                    | 10.850 | 0.123 | 0.117  | 0.364  | 0.535  | 0.499  | 0.630  |
| Apolipoprotein C-III OS=Homo sapiens GN=APOC3 PE=1 SV=1                                               | 10.852 | 0.079 | 8.481  | 4.577  | 3.116  | 2.095  | 0.535  |
| Apolipoprotein A-II OS=Homo sapiens GN=APOA2 PE=1 SV=1                                                | 11.175 | 7.481 | 17.874 | 14.088 | 13.302 | 14.543 | 22.426 |
| Ig lambda-3 chain C regions OS=Homo sapiens GN=IGLC3 PE=1 SV=1                                        | 11.238 | 0.000 | 0.351  | 0.880  | 1.774  | 0.627  | 0.545  |
| Apolipoprotein C-II OS=Homo sapiens GN=APOC2 PE=1 SV=1                                                | 11.284 | 0.114 | 5.522  | 2.607  | 1.632  | 1.048  | 0.398  |
| Ig lambda-1 chain C regions OS=Homo sapiens GN=IGLC1 PE=1 SV=1                                        | 11.348 | 0.000 | 0.000  | 0.000  | 0.000  | 0.932  | 0.853  |
| Platelet factor 4 variant OS=Homo sapiens GN=PF4V1 PE=1 SV=1                                          | 11.553 | 0.000 | 0.115  | 0.000  | 0.000  | 0.000  | 0.000  |
| Ig kappa chain C region OS=Homo sapiens GN=IGKC PE=1 SV=1                                             | 11.609 | 0.959 | 0.632  | 2.127  | 1.727  | 1.872  | 1.368  |
| Immunoglobulin lambda variable 1-47 OS=Homo sapiens GN=IGLV1-47 PE=1 SV=2                             | 12.284 | 0.014 | 0.000  | 0.040  | 0.024  | 0.035  | 0.017  |
| Immunoglobulin kappa variable 3-15 OS=Homo sapiens GN=IGKV3-15 PE=1 SV=2                              | 12.496 | 0.000 | 0.000  | 0.031  | 0.030  | 0.030  | 0.000  |
| Immunoglobulin kappa variable 3-20 OS=Homo sapiens GN=IGKV3-20 PE=1 SV=2                              | 12.557 | 0.011 | 0.000  | 0.054  | 0.000  | 0.043  | 0.035  |
| Immunoglobulin kappa variable 3-11 OS=Homo sapiens GN=IGKV3-11 PE=1 SV=1                              | 12.575 | 0.000 | 0.000  | 0.038  | 0.023  | 0.021  | 0.000  |
| Vesicle-associated membrane protein 5 OS=Homo sapiens GN=VAMP5 PE=1 SV=1                              | 12.805 | 0.000 | 0.000  | 0.000  | 0.000  | 0.058  | 0.000  |
| Apolipoprotein M OS=Homo sapiens GN=APOM PE=1 SV=2                                                    | 13.051 | 0.008 | 0.016  | 0.045  | 0.041  | 0.061  | 0.064  |
| Protein FAM27E3 OS=Homo sapiens GN=FAM27E3 PE=1 SV=1                                                  | 13.507 | 0.000 | 0.000  | 0.000  | 0.010  | 0.012  | 0.128  |
| Serum amyloid A-2 protein OS=Homo sapiens GN=SAA2 PE=1 SV=1                                           | 13.527 | 0.000 | 1.030  | 0.650  | 0.554  | 0.474  | 0.252  |
| Serum amyloid A-1 protein OS=Homo sapiens GN=SAA1 PE=1 SV=1                                           | 13.532 | 0.029 | 1.658  | 1.198  | 1.007  | 0.822  | 0.318  |
| Beta-2-microglobulin OS=Homo sapiens GN=B2M PE=1 SV=1                                                 | 13.715 | 0.000 | 0.004  | 0.023  | 0.035  | 0.038  | 0.000  |
| Platelet basic protein OS=Homo sapiens GN=PPBP PE=1 SV=3                                              | 13.890 | 0.106 | 0.043  | 0.843  | 0.677  | 0.731  | 0.621  |
| Apolipoprotein C-IV OS=Homo sapiens GN=APOC4 PE=1 SV=1                                                | 14.553 | 0.023 | 0.215  | 0.269  | 0.362  | 0.293  | 0.391  |
| Serum amyloid A-4 protein OS=Homo sapiens GN=SAA4 PE=1 SV=2                                           | 14.747 | 0.066 | 0.580  | 0.704  | 0.406  | 0.632  | 0.745  |
| Cystatin-C OS=Homo sapiens GN=CT3 PE=1 SV=1                                                           | 15.800 | 0.017 | 0.126  | 0.141  | 0.193  | 0.137  | 0.131  |
| Transthyretin OS=Homo sapiens GN=TTR PE=1 SV=1                                                        | 15.887 | 0.000 | 0.551  | 0.621  | 0.239  | 0.297  | 0.063  |
| Hemoglobin subunit gamma-2 OS=Homo sapiens GN=HBG2 PE=1 SV=2                                          | 16.126 | 0.006 | 0.000  | 0.000  | 0.000  | 0.013  | 0.019  |
| Lysozyme C OS=Homo sapiens GN=LYZ PE=1 SV=1                                                           | 16.537 | 0.012 | 14.563 | 0.033  | 0.058  | 0.056  | 0.047  |
| Angiogenin OS=Homo sapiens GN=ANG PE=1 SV=1                                                           | 16.561 | 0.017 | 0.000  | 0.024  | 0.043  | 0.040  | 0.000  |
| Ribonuclease 4 OS=Homo sapiens GN=RNASE4 PE=1 SV=3                                                    | 16.925 | 0.000 | 0.000  | 0.000  | 0.026  | 0.019  | 0.024  |
| Immunoglobulin J chain OS=Homo sapiens GN=JCHAIN PE=1 SV=4                                            | 18.099 | 0.000 | 0.000  | 0.000  | 0.000  | 0.004  | 0.000  |
| Cofilin-1 OS=Homo sapiens GN=CFL1 PE=1 SV=3                                                           | 18.502 | 0.002 | 0.016  | 0.017  | 0.032  | 0.033  | 0.030  |
| Retinoic acid receptor responder protein 2 OS=Homo sapiens GN=RARRES2 PE=1 SV=1                       | 18.618 | 0.014 | 0.032  | 0.037  | 0.045  | 0.036  | 0.051  |
| REVERSED Transmembrane and coiled-coil domain-containing protein 2 OS=Homo sapiens GN=TMCO2 PE=2 SV=1 | 20.071 | 0.000 | 0.008  | 0.000  | 0.000  | 0.000  | 0.000  |
| Insulin-like growth factor II OS=Homo sapiens GN=IGF2 PE=1 SV=1                                       | 20.274 | 0.008 | 0.055  | 0.047  | 0.027  | 0.015  | 0.034  |
| Apolipoprotein D OS=Homo sapiens GN=APOD PE=1 SV=1                                                    | 21.276 | 0.015 | 0.047  | 0.112  | 0.043  | 0.091  | 0.160  |
| Insulin-like growth factor 1 OS=Homo sapiens GN=IGF1 PE=1 SV=1                                        | 21.841 | 0.000 | 0.000  | 0.000  | 0.000  | 0.021  | 0.024  |
| Complement component C8 gamma chain OS=Homo sapiens GN=C8G PE=1 SV=3                                  | 22.277 | 0.044 | 0.000  | 0.000  | 0.000  | 0.000  | 0.000  |
| Transgelin-2 OS=Homo sapiens GN=TAGLN2 PE=1 SV=3                                                      | 22.391 | 0.000 | 0.000  | 0.010  | 0.000  | 0.000  | 0.001  |
| Tetranectin OS=Homo sapiens GN=CLEC3B PE=1 SV=3                                                       | 22.537 | 0.181 | 1.112  | 0.496  | 0.304  | 0.312  | 0.247  |
| Retinol-binding protein 4 OS=Homo sapiens GN=RBP4 PE=1 SV=3                                           | 23.010 | 0.000 | 0.000  | 0.000  | 0.008  | 0.013  | 0.042  |
| Insulin-like growth factor-binding protein 6 OS=Homo sapiens GN=IGFBP6 PE=1 SV=1                      | 25.320 | 0.000 | 0.001  | 0.013  | 0.010  | 0.009  | 0.000  |
| Serum amyloid P-component OS=Homo sapiens GN=APCS PE=1 SV=2                                           | 25.387 | 0.051 | 0.000  | 0.000  | 0.000  | 0.000  | 0.000  |
| Glutathione peroxidase 3 OS=Homo sapiens GN=GPX3 PE=1 SV=2                                            | 25.552 | 0.008 | 0.075  | 0.054  | 0.027  | 0.023  | 0.047  |
| Complement C1q subcomponent subunit C OS=Homo sapiens GN=C1QC PE=1 SV=3                               | 25.774 | 0.000 | 0.000  | 0.013  | 0.011  | 0.006  | 0.029  |
| Complement C1q subcomponent subunit B OS=Homo sapiens GN=C1QB PE=1 SV=3                               | 26.722 | 0.000 | 0.000  | 0.007  | 0.000  | 0.006  | 0.000  |
| Complement factor D OS=Homo sapiens GN=CFD PE=1 SV=5                                                  | 27.870 | 0.031 | 0.039  | 0.090  | 0.056  | 0.059  | 0.181  |
| Insulin-like growth factor-binding protein 4 OS=Homo sapiens GN=IGFBP4 PE=1 SV=2                      | 27.940 | 0.001 | 0.000  | 0.012  | 0.014  | 0.012  | 0.000  |
| Insulin-like growth factor-binding protein 5 OS=Homo sapiens GN=IGFBP5 PE=1 SV=1                      | 30.570 | 0.003 | 0.000  | 0.000  | 0.004  | 0.000  | 0.009  |
| Complement factor H-related protein 2 OS=Homo sapiens GN=CFHR2 PE=1 SV=1                              | 30.651 | 0.113 | 0.086  | 0.075  | 0.069  | 0.000  | 0.000  |
| Apolipoprotein A-I OS=Homo sapiens GN=APOA1 PE=1 SV=1                                                 | 30.778 | 9.106 | 90.776 | 78.863 | 59.483 | 65.113 | 71.728 |
| Insulin-like growth factor-binding protein 3 OS=Homo sapiens GN=IGFBP3 PE=1 SV=2                      | 31.674 | 0.009 | 0.015  | 0.011  | 0.011  | 0.009  | 0.016  |
| Insulin-like growth factor-binding protein 2 OS=Homo sapiens GN=IGFBP2 PE=1 SV=2                      | 34.814 | 0.003 | 0.000  | 0.000  | 0.000  | 0.005  | 0.008  |
| Apolipoprotein F OS=Homo sapiens GN=APOF PE=1 SV=2                                                    | 35.399 | 0.000 | 0.062  | 0.025  | 0.008  | 0.011  | 0.000  |
| Ig gamma-2 chain C region OS=Homo sapiens GN=IGHG2 PE=1 SV=2                                          | 35.901 | 0.424 | 0.000  | 0.600  | 0.684  | 0.671  | 0.474  |
| Ig gamma-4 chain C region OS=Homo sapiens GN=IGHG4 PE=1 SV=1                                          | 35.941 | 0.000 | 0.185  | 0.000  | 0.000  | 0.000  | 0.923  |
| Ig gamma-1 chain C region OS=Homo sapiens GN=IGHG1 PE=1 SV=1                                          | 36.106 | 1.351 | 0.373  | 1.884  | 2.016  | 1.777  | 1.443  |
| Apolipoprotein E OS=Homo sapiens GN=APOE PE=1 SV=1                                                    | 36.154 | 0.670 | 4.835  | 5.497  | 4.659  | 4.380  | 6.401  |
| Complement factor H-related protein 1 OS=Homo sapiens GN=CFHR1 PE=1 SV=2                              | 37.651 | 0.196 | 0.291  | 0.172  | 0.144  | 0.160  | 0.197  |
| Ig alpha-1 chain C region OS=Homo sapiens GN=IGHA1 PE=1 SV=2                                          | 37.663 | 0.026 | 0.162  | 0.056  | 0.062  | 0.095  | 0.120  |
| Beta-2-glycoprotein 1 OS=Homo sapiens GN=APOH PE=1 SV=3                                               | 38.298 | 0.507 | 0.616  | 0.181  | 0.085  | 0.058  | 0.253  |
| Protein AMBP OS=Homo sapiens GN=AMBP PE=1 SV=1                                                        | 38.999 | 0.009 | 0.056  | 0.029  | 0.012  | 0.009  | 0.014  |
| Alpha-2-HS-glycoprotein OS=Homo sapiens GN=AHSG PE=1 SV=1                                             | 39.325 | 0.670 | 5.589  | 3.006  | 1.790  | 1.606  | 3.363  |
| Serum paraoxonase/arylesterase 1 OS=Homo sapiens GN=PON1 PE=1 SV=3                                    | 39.731 | 0.025 | 0.071  | 0.070  | 0.035  | 0.064  | 0.067  |
| Ig gamma-3 chain C region OS=Homo sapiens GN=IGHG3 PE=1 SV=2                                          | 41.287 | 0.723 | 0.293  | 1.512  | 1.542  | 1.292  | 0.997  |
| Actin, cytoplasmic 2 OS=Homo sapiens GN=ACTG1 PE=1 SV=1                                               | 41.793 | 0.000 | 0.003  | 0.000  | 0.000  | 0.000  | 0.000  |
| Putative beta-actin-like protein 3 OS=Homo sapiens GN=POTEKP PE=5 SV=1                                | 42.016 | 0.000 | 0.011  | 0.000  | 0.000  | 0.000  | 0.000  |
| Haptoglobin-related protein OS=Homo sapiens GN=HPR PE=2 SV=2                                          | 43.078 | 0.000 | 0.171  | 0.018  | 0.024  | 0.037  | 0.088  |
| Selenoprotein P OS=Homo sapiens GN=SEPP1 PE=1 SV=3                                                    | 43.174 | 0.059 | 0.304  | 0.204  | 0.194  | 0.198  | 0.364  |
| Apolipoprotein L1 OS=Homo sapiens GN=APOLI1 PE=1 SV=5                                                 | 43.974 | 0.002 | 0.034  | 0.017  | 0.017  | 0.017  | 0.021  |
| Haptoglobin OS=Homo sapiens GN=HP PE=1 SV=1                                                           | 45.205 | 0.008 | 0.325  | 0.017  | 0.019  | 0.033  | 0.037  |
| Apolipoprotein A-IV OS=Homo sapiens GN=APOA4 PE=1 SV=3                                                | 45.399 | 0.411 | 5.133  | 4.867  | 2.873  | 2.764  | 1.479  |
| Plasma serine protease inhibitor OS=Homo sapiens GN=SERPINA5 PE=1 SV=3                                | 45.680 | 0.000 | 0.000  | 0.000  | 0.009  | 0.014  | 0.044  |
| Pigment epithelium-derived factor OS=Homo sapiens GN=SERPINF1 PE=1 SV=4                               | 46.312 | 0.107 | 0.007  | 0.057  | 0.028  | 0.027  | 0.076  |
| Alpha-1-antitrypsin OS=Homo sapiens GN=SERPINA1 PE=1 SV=3                                             | 46.737 | 0.002 | 0.187  | 0.155  | 0.067  | 0.066  | 0.042  |
| Keratin, type I cuticular Ha1 OS=Homo sapiens GN=KRT31 PE=1 SV=3                                      | 47.237 | 0.000 | 0.000  | 0.000  | 0.000  | 0.000  | 0.017  |
| Alpha-1-antichymotrypsin OS=Homo sapiens GN=SERPINA3 PE=1 SV=2                                        | 47.651 | 0.004 | 0.000  | 0.000  | 0.000  | 0.000  | 0.002  |
| Procollagen C-endopeptidase enhancer 1 OS=Homo sapiens GN=PCOLCE PE=1 SV=2                            | 47.972 | 0.002 | 0.000  | 0.006  | 0.006  | 0.012  | 0.064  |
| Kallistatin OS=Homo sapiens GN=SERPINA4 PE=1 SV=3                                                     | 48.542 | 0.003 | 0.000  | 0.000  | 0.000  | 0.000  | 0.000  |
| Ig mu chain C region OS=Homo sapiens GN=IGHM PE=1 SV=3                                                | 49.307 | 0.023 | 0.007  | 0.010  | 0.030  | 0.042  | 0.088  |
| REVERSED Adenyltransferase and sulfatransferase MOCS3 OS=Homo sapiens GN=MOCS3 PE=1 SV=1              | 49.669 | 0.000 | 0.051  | 0.000  | 0.000  | 0.000  | 0.000  |
| RUN domain-containing protein 3A OS=Homo sapiens GN=RUNC3A PE=1 SV=2                                  | 49.747 | 0.000 | 0.014  | 0.021  | 0.027  | 0.027  | 0.098  |
| Fibrinogen gamma chain OS=Homo sapiens GN=FGG PE=1 SV=3                                               | 51.512 | 0.000 | 0.000  | 0.000  | 0.000  | 0.000  | 0.000  |
| Hemopexin OS=Homo sapiens GN=HPX PE=1 SV=2                                                            | 51.676 | 0.071 | 0.133  | 0.510  | 0.269  | 0.194  | 0.151  |
| Coagulation factor IX OS=Homo sapiens GN=F9 PE=1 SV=2                                                 | 51.778 | 0.000 | 0.001  | 0.000  | 0.000  | 0.000  | 0.000  |
| Adenylyl cyclase-associated protein 1 OS=Homo sapiens GN=CAPI1 PE=1 SV=5                              | 51.901 | 0.000 | 0.000  | 0.004  | 0.002  | 0.012  | 0.000  |
| Ig lambda-2 chain C regions OS=Homo sapiens GN=IGLC2 PE=1 SV=1                                        | 52.199 | 0.067 | 0.140  | 0.330  | 0.174  | 0.183  | 0.237  |
| Clusterin OS=Homo sapiens GN=CLU PE=1 SV=1                                                            | 52.495 | 0.091 | 1.173  | 0.313  | 0.173  | 0.160  | 0.074  |
| FAS-associated factor 2 OS=Homo sapiens GN=FAF2 PE=1 SV=2                                             | 52.623 | 0.000 | 0.000  | 0.000  | 0.000  | 0.001  | 0.000  |
| Vitamin D-binding protein OS=Homo sapiens GN=GC PE=1 SV=1                                             | 52.964 | 0.025 | 0.558  | 0.159  | 0.033  | 0.027  | 0.017  |
| Angiotensinogen OS=Homo sapiens GN=AGT PE=1 SV=1                                                      | 53.154 | 0.000 | 0.004  | 0.000  | 0.000  | 0.000  | 0.000  |
| Lipopolysaccharide-binding protein OS=Homo sapiens GN=LBP PE=1 SV=3                                   | 53.319 | 0.005 | 0.001  | 0.000  | 0.000  | 0.000  | 0.003  |
| Keratin, type II cuticular Hb6 OS=Homo sapiens GN=KRT86 PE=1 SV=1                                     | 53.501 | 0.000 | 0.000  | 0.000  | 0.000  | 0.000  | 0.012  |
| Alpha-1B-glycoprotein OS=Homo sapiens GN=A1BG PE=1 SV=4                                               | 54.254 | 0.000 | 0.025  | 0.000  | 0.000  | 0.000  | 0.000  |

|                                                                                                                   |         |         |         |         |         |         |        |
|-------------------------------------------------------------------------------------------------------------------|---------|---------|---------|---------|---------|---------|--------|
| Vitronectin OS=Homo sapiens GN=VTN PE=1 SV=1                                                                      | 54.306  | 0.282   | 1.295   | 0.409   | 0.235   | 0.261   | 0.229  |
| Alpha-2-antiplasmin OS=Homo sapiens GN=SERPINF2 PE=1 SV=3                                                         | 54.566  | 0.000   | 0.040   | 0.000   | 0.002   | 0.004   | 0.000  |
| EGF-containing fibulin-like extracellular matrix protein 1 OS=Homo sapiens GN=EFEMP1 PE=1 SV=2                    | 54.641  | 0.000   | 0.028   | 0.000   | 0.000   | 0.000   | 0.000  |
| Plasma protease C1 inhibitor OS=Homo sapiens GN=SERPING1 PE=1 SV=2                                                | 55.154  | 0.007   | 0.000   | 0.000   | 0.000   | 0.000   | 0.000  |
| Sperm-associated antigen 6 OS=Homo sapiens GN=SPAG6 PE=2 SV=1                                                     | 55.476  | 0.001   | 0.000   | 0.003   | 0.002   | 0.002   | 0.000  |
| Fibrinogen beta chain OS=Homo sapiens GN=FGB PE=1 SV=2                                                            | 55.928  | 0.006   | 0.000   | 0.000   | 0.000   | 0.000   | 0.000  |
| Heparin cofactor 2 OS=Homo sapiens GN=SERPIND1 PE=1 SV=3                                                          | 57.071  | 0.003   | 0.016   | 0.001   | 0.002   | 0.001   | 0.001  |
| Histidine-rich glycoprotein OS=Homo sapiens GN=HRG PE=1 SV=1                                                      | 59.578  | 3.413   | 7.937   | 8.932   | 10.002  | 11.133  | 18.933 |
| REVERSED Histone H4 transcription factor OS=Homo sapiens GN=HNFPP PE=1 SV=2                                       | 59.678  | 0.004   | 0.000   | 0.000   | 0.016   | 0.017   | 0.069  |
| REVERSED Glucosylceramidase OS=Homo sapiens GN=GBA PE=1 SV=3                                                      | 59.716  | 0.000   | 0.000   | 0.000   | 0.002   | 0.000   | 0.000  |
| ATP synthase subunit alpha, mitochondrial OS=Homo sapiens GN=ATP5A1 PE=1 SV=1                                     | 59.751  | 0.000   | 0.000   | 0.000   | 0.000   | 0.001   | 0.000  |
| Keratin, type II cytoskeletal 6C OS=Homo sapiens GN=KRT6C PE=1 SV=3                                               | 60.025  | 0.000   | 0.001   | 0.000   | 0.000   | 0.000   | 0.000  |
| Keratin, type II cytoskeletal 9 OS=Homo sapiens GN=KRT9 PE=1 SV=3                                                 | 62.064  | 0.000   | 0.014   | 0.000   | 0.000   | 0.000   | 0.000  |
| N-acetylmuramoyl-L-alanine amidase OS=Homo sapiens GN=PGLYRP2 PE=1 SV=1                                           | 62.219  | 0.001   | 0.004   | 0.000   | 0.000   | 0.000   | 0.000  |
| Leucine-rich repeat LG1 family member 2 OS=Homo sapiens GN=LG12 PE=2 SV=1                                         | 62.298  | 0.000   | 0.000   | 0.000   | 0.015   | 0.000   | 0.000  |
| Hyaluronan-binding protein 2 OS=Homo sapiens GN=HABP2 PE=1 SV=1                                                   | 62.672  | 0.002   | 0.000   | 0.000   | 0.000   | 0.000   | 0.000  |
| Complement component C9 OS=Homo sapiens GN=C9 PE=1 SV=2                                                           | 63.173  | 0.032   | 0.022   | 0.004   | 0.001   | 0.000   | 0.008  |
| C4b-binding protein alpha chain OS=Homo sapiens GN=C4BPA PE=1 SV=2                                                | 64.283  | 0.000   | 0.000   | 0.074   | 0.045   | 0.038   | 0.004  |
| Complement factor H-related protein 5 OS=Homo sapiens GN=CFHR5 PE=1 SV=1                                          | 64.430  | 0.000   | 0.025   | 0.000   | 0.000   | 0.000   | 0.000  |
| REVERSED Zinc finger protein 211 OS=Homo sapiens GN=ZNF211 PE=2 SV=2                                              | 64.535  | 0.000   | 0.000   | 0.000   | 0.008   | 0.000   | 0.000  |
| Complement component C8 alpha chain OS=Homo sapiens GN=C8A PE=1 SV=2                                              | 65.163  | 0.010   | 0.000   | 0.000   | 0.000   | 0.000   | 0.000  |
| Coiled-coil domain-containing protein 38 OS=Homo sapiens GN=CCDC38 PE=2 SV=1                                      | 65.315  | 0.000   | 0.000   | 0.000   | 0.000   | 0.003   | 0.000  |
| Keratin, type II cytoskeletal 2 epidermal OS=Homo sapiens GN=KRT2 PE=1 SV=2                                       | 65.433  | 0.004   | 0.000   | 0.000   | 0.000   | 0.000   | 0.000  |
| Complement factor I OS=Homo sapiens GN=CFI PE=1 SV=2                                                              | 65.750  | 0.006   | 0.003   | 0.000   | 0.000   | 0.000   | 0.000  |
| Insulin-like growth factor-binding protein complex acid labile subunit OS=Homo sapiens GN=IGFALS PE=1 SV=1        | 66.035  | 0.011   | 0.001   | 0.001   | 0.004   | 0.009   | 0.028  |
| Keratin, type II cytoskeletal 1 OS=Homo sapiens GN=KRT1 PE=1 SV=6                                                 | 66.039  | 0.010   | 0.023   | 0.000   | 0.000   | 0.000   | 0.027  |
| All-trans-retinol 13,14-reductase OS=Homo sapiens GN=RETSAT PE=1 SV=2                                             | 66.820  | 0.000   | 0.000   | 0.000   | 0.005   | 0.007   | 0.000  |
| Complement component C8 beta chain OS=Homo sapiens GN=C8B PE=1 SV=3                                               | 67.047  | 0.013   | 0.000   | 0.000   | 0.000   | 0.000   | 0.000  |
| Probable ATP-dependent RNA helicase DDX52 OS=Homo sapiens GN=DDX52 PE=1 SV=3                                      | 67.498  | 0.000   | 0.000   | 0.000   | 0.000   | 0.189   | 0.000  |
| Coagulation factor XII OS=Homo sapiens GN=F12 PE=1 SV=3                                                           | 67.792  | 0.220   | 0.763   | 0.403   | 0.328   | 0.465   | 0.547  |
| Afamin OS=Homo sapiens GN=AFM PE=1 SV=1                                                                           | 69.070  | 0.000   | 0.003   | 0.000   | 0.000   | 0.000   | 0.000  |
| Serum albumin OS=Homo sapiens GN=ALB PE=1 SV=2                                                                    | 69.367  | 6.775   | 12.932  | 4.630   | 3.596   | 3.304   | 3.659  |
| Prothrombin OS=Homo sapiens GN=F2 PE=1 SV=2                                                                       | 70.037  | 0.026   | 0.383   | 0.164   | 0.111   | 0.097   | 0.053  |
| Coagulation factor XI OS=Homo sapiens GN=F11 PE=1 SV=1                                                            | 70.109  | 0.000   | 0.000   | 0.000   | 0.000   | 0.000   | 0.000  |
| Hepatocyte growth factor activator OS=Homo sapiens GN=HGFA PE=1 SV=1                                              | 70.682  | 0.014   | 0.020   | 0.039   | 0.049   | 0.057   | 0.102  |
| Secretogranin-2 OS=Homo sapiens GN=SG2 PE=1 SV=2                                                                  | 70.941  | 0.000   | 0.000   | 0.000   | 0.000   | 0.006   | 0.000  |
| Plasma kallikrein OS=Homo sapiens GN=KLKB1 PE=1 SV=1                                                              | 71.370  | 0.009   | 0.044   | 0.014   | 0.006   | 0.009   | 0.000  |
| Cartilage acidic protein 1 OS=Homo sapiens GN=CRTAC1 PE=1 SV=2                                                    | 71.421  | 0.000   | 0.000   | 0.000   | 0.000   | 0.000   | 0.003  |
| Kininogen-1 OS=Homo sapiens GN=KNG1 PE=1 SV=2                                                                     | 71.957  | 0.232   | 1.333   | 0.633   | 0.905   | 0.486   | 0.185  |
| REVERSED Differentially expressed in FDPC 6 homolog OS=Homo sapiens GN=DEF6 PE=1 SV=1                             | 73.910  | 0.000   | 0.027   | 0.000   | 0.026   | 0.000   | 0.046  |
| Complement C1s subcomponent OS=Homo sapiens GN=C1S PE=1 SV=1                                                      | 76.684  | 0.000   | 0.004   | 0.000   | 0.000   | 0.000   | 0.000  |
| Serotransferrin OS=Homo sapiens GN=TF PE=1 SV=3                                                                   | 77.064  | 0.068   | 0.028   | 0.046   | 0.055   | 0.071   | 0.135  |
| REVERSED Endoplasmic reticulum mannosyl-oligosaccharide 1,2-alpha-mannosidase OS=Homo sapiens GN=MAN1B1 PE=1 SV=2 | 79.580  | 0.000   | 0.000   | 0.000   | 0.000   | 0.001   | 0.000  |
| Putative macrophage stimulating 1-like protein OS=Homo sapiens GN=MS1L PE=2 SV=2                                  | 79.694  | 0.002   | 0.000   | 0.000   | 0.000   | 0.000   | 0.000  |
| Complement C1r subcomponent OS=Homo sapiens GN=C1R PE=1 SV=2                                                      | 80.119  | 0.000   | 0.000   | 0.000   | 0.000   | 0.000   | 0.000  |
| SEC14-like protein 1 OS=Homo sapiens GN=SEC14L1 PE=1 SV=2                                                         | 81.250  | 0.000   | 0.009   | 0.000   | 0.000   | 0.000   | 0.000  |
| Sulfhydryl oxidase 1 OS=Homo sapiens GN=SOX1 PE=1 SV=3                                                            | 82.578  | 0.001   | 0.000   | 0.000   | 0.000   | 0.000   | 0.000  |
| Complement C2 OS=Homo sapiens GN=C2 PE=1 SV=2                                                                     | 83.266  | 0.030   | 0.061   | 0.052   | 0.012   | 0.016   | 0.036  |
| Complement factor B OS=Homo sapiens GN=CFB PE=1 SV=2                                                              | 85.533  | 0.265   | 0.175   | 0.041   | 0.017   | 0.021   | 0.003  |
| Gelsolin OS=Homo sapiens GN=GSN PE=1 SV=1                                                                         | 85.698  | 0.495   | 1.337   | 1.828   | 1.240   | 0.943   | 0.781  |
| REVERSED tRNA (cytosine[34]-C[5])-methyltransferase OS=Homo sapiens GN=NSUN2 PE=1 SV=2                            | 86.471  | 0.000   | 0.000   | 0.000   | 0.000   | 0.000   | 0.005  |
| Plasminogen OS=Homo sapiens GN=PLG PE=1 SV=2                                                                      | 90.569  | 0.341   | 0.387   | 0.801   | 0.667   | 0.660   | 0.765  |
| Complement component C7 OS=Homo sapiens GN=C7 PE=1 SV=2                                                           | 93.518  | 0.000   | 0.000   | 0.000   | 0.000   | 0.000   | 0.000  |
| Fibrinogen alpha chain OS=Homo sapiens GN=FGA PE=1 SV=2                                                           | 94.973  | 0.000   | 0.277   | 0.276   | 0.217   | 0.235   | 0.127  |
| Rab GTPase-binding effector protein 1 OS=Homo sapiens GN=RABEP1 PE=1 SV=2                                         | 99.290  | 0.000   | 0.000   | 0.000   | 0.000   | 0.000   | 0.003  |
| Inter-alpha-trypsin inhibitor heavy chain III OS=Homo sapiens GN=ITHI1 PE=1 SV=3                                  | 101.389 | 0.012   | 0.026   | 0.005   | 0.002   | 0.004   | 0.002  |
| Inter-alpha-trypsin inhibitor heavy chain H4 OS=Homo sapiens GN=ITH4 PE=1 SV=4                                    | 103.357 | 0.050   | 0.163   | 0.188   | 0.101   | 0.103   | 0.562  |
| Complement component C6 OS=Homo sapiens GN=C6 PE=1 SV=3                                                           | 104.786 | 0.016   | 0.063   | 0.080   | 0.009   | 0.010   | 0.004  |
| Inter-alpha-trypsin inhibitor heavy chain H2 OS=Homo sapiens GN=ITH2 PE=1 SV=2                                    | 106.463 | 0.017   | 0.034   | 0.006   | 0.010   | 0.003   | 0.000  |
| Ankyrin repeat domain-containing protein 35 OS=Homo sapiens GN=ANKRD35 PE=2 SV=2                                  | 109.966 | 0.000   | 0.016   | 0.023   | 0.016   | 0.011   | 0.006  |
| ADAMTS-like protein 4 OS=Homo sapiens GN=ADAMTSL4 PE=1 SV=2                                                       | 116.545 | 0.000   | 0.002   | 0.000   | 0.000   | 0.001   | 0.000  |
| POTE ankyrin domain family member E OS=Homo sapiens GN=POTEE PE=2 SV=3                                            | 121.363 | 0.000   | 0.001   | 0.000   | 0.000   | 0.000   | 0.000  |
| Ceruloplasmin OS=Homo sapiens GN=CP PE=1 SV=1                                                                     | 122.205 | 0.022   | 0.000   | 0.000   | 0.000   | 0.000   | 0.000  |
| Thrombospondin-1 OS=Homo sapiens GN=THBS1 PE=1 SV=2                                                               | 129.390 | 0.000   | 0.001   | 0.002   | 0.000   | 0.000   | 0.006  |
| Partner and localizer of BRCA2 OS=Homo sapiens GN=PALB2 PE=1 SV=1                                                 | 131.295 | 0.000   | 0.000   | 0.000   | 0.000   | 0.001   | 0.000  |
| Sperm-associated antigen 5 OS=Homo sapiens GN=SPAG5 PE=1 SV=2                                                     | 134.422 | 0.000   | 0.000   | 0.000   | 0.010   | 0.000   | 0.000  |
| Complement factor H OS=Homo sapiens GN=CFH PE=1 SV=4                                                              | 139.096 | 0.021   | 0.166   | 0.020   | 0.002   | 0.009   | 0.016  |
| Sterol regulatory element-binding protein cleavage-activating protein OS=Homo sapiens GN=SCAP PE=1 SV=4           | 139.729 | 0.000   | 0.005   | 0.000   | 0.000   | 0.000   | 0.000  |
| Proteoglycan 4 OS=Homo sapiens GN=PRG4 PE=1 SV=2                                                                  | 151.077 | 0.010   | 0.123   | 0.023   | 0.021   | 0.019   | 0.024  |
| REVERSED Tensin-2 OS=Homo sapiens GN=TNS2 PE=1 SV=2                                                               | 152.580 | 0.000   | 0.000   | 0.002   | 0.000   | 0.002   | 0.000  |
| Uncharacterized protein KIAA1107 OS=Homo sapiens GN=KIAA1107 PE=1 SV=2                                            | 155.681 | 0.000   | 0.000   | 0.001   | 0.000   | 0.000   | 0.000  |
| Alpha-2-macroglobulin OS=Homo sapiens GN=A2M PE=1 SV=3                                                            | 163.291 | 0.003   | 0.002   | 0.004   | 0.010   | 0.009   | 0.011  |
| Complement C3 OS=Homo sapiens GN=C3 PE=1 SV=2                                                                     | 187.148 | 0.568   | 1.676   | 1.222   | 1.271   | 1.084   | 1.554  |
| Complement C4-B OS=Homo sapiens GN=C4B PE=1 SV=2                                                                  | 192.751 | 0.099   | 0.539   | 0.454   | 0.345   | 0.000   | 0.497  |
| Complement C4-A OS=Homo sapiens GN=C4A PE=1 SV=2                                                                  | 192.785 | 0.120   | 0.000   | 0.470   | 0.470   | 0.471   | 0.560  |
| Protein TANC1 OS=Homo sapiens GN=TANC1 PE=1 SV=3                                                                  | 202.219 | 0.000   | 0.001   | 0.000   | 0.000   | 0.000   | 0.000  |
| Protein NLRC5 OS=Homo sapiens GN=NLRC5 PE=1 SV=3                                                                  | 204.595 | 0.000   | 0.000   | 0.000   | 0.000   | 0.001   | 0.000  |
| Periplakin OS=Homo sapiens GN=PPL PE=1 SV=4                                                                       | 204.747 | 0.000   | 0.000   | 0.000   | 0.001   | 0.000   | 0.000  |
| Coagulation factor V OS=Homo sapiens GN=F5 PE=1 SV=4                                                              | 251.700 | 0.001   | 0.003   | 0.001   | 0.001   | 0.002   | 0.000  |
| Fibronectin OS=Homo sapiens GN=FN1 PE=1 SV=4                                                                      | 262.622 | 0.001   | 0.002   | 0.002   | 0.000   | 0.000   | 0.000  |
| REVERSED Myomegalin OS=Homo sapiens GN=PDE4DIP PE=1 SV=1                                                          | 265.080 | 0.001   | 0.000   | 0.000   | 0.000   | 0.000   | 0.000  |
| Talin-1 OS=Homo sapiens GN=TLN1 PE=1 SV=3                                                                         | 269.767 | 0.000   | 0.000   | 0.001   | 0.002   | 0.002   | 0.001  |
| Nucleosome-remodeling factor subunit BPTF OS=Homo sapiens GN=BPTF PE=1 SV=3                                       | 338.262 | 0.000   | 0.000   | 0.000   | 0.000   | 0.002   | 0.000  |
| Apolipoprotein(a) OS=Homo sapiens GN=LPA PE=1 SV=1                                                                | 501.319 | 0.004   | 0.000   | 0.000   | 0.000   | 0.001   | 0.003  |
| Dynein heavy chain 8, axonemal OS=Homo sapiens GN=DNAH8 PE=1 SV=2                                                 | 514.664 | 0.000   | 0.000   | 0.000   | 0.001   | 0.000   | 0.000  |
| Apolipoprotein B-100 OS=Homo sapiens GN=APOB PE=1 SV=2                                                            | 515.605 | 0.035   | 0.026   | 0.108   | 0.190   | 0.172   | 0.548  |
| TOTAL PROTEIN CONTENT (mg/g)                                                                                      | 38.290  | 212.851 | 170.295 | 135.990 | 137.664 | 149.406 |        |

**Table S3.** Values of NSpC x TGA for all proteins found in protein corona analysis of PCa patient serum samples. Total protein content determined by TGA is indicated at the end of the list for every patient. Data in mg/g.

| PROTEIN NAME                                          | Mw     | PA-1   | PA-2  | PA-3   | PA-4   | PA-5   | PA-6   | PA-7   | PA-8   | PA-9   | PA-10  | PA-11  | PA-12  | PA-13  | PA-14  | PA-15  | PA-16  | PA-17  | PA-18  | PA-19  | PA-20  | PA-21  | PA-22   |       |
|-------------------------------------------------------|--------|--------|-------|--------|--------|--------|--------|--------|--------|--------|--------|--------|--------|--------|--------|--------|--------|--------|--------|--------|--------|--------|---------|-------|
| Nephrilkinin-3                                        | 1.088  | 0.000  | 0.000 | 0.000  | 0.000  | 0.752  | 0.000  | 0.000  | 0.000  | 0.000  | 0.000  | 0.000  | 0.000  | 0.000  | 0.000  | 0.000  | 0.000  | 0.000  | 0.000  | 0.000  | 0.000  | 0.000  | 0.000   | 0.000 |
| Thymosin beta-4                                       | 5.053  | 0.000  | 0.000 | 0.000  | 0.000  | 0.000  | 3.518  | 0.000  | 0.000  | 0.000  | 0.000  | 0.719  | 1.288  | 0.136  | 1.204  | 0.000  | 0.000  | 0.000  | 0.000  | 0.000  | 0.000  | 0.000  | 0.000   | 0.000 |
| Neurogranin                                           | 7.618  | 0.000  | 0.000 | 0.000  | 0.000  | 0.000  | 0.000  | 0.000  | 0.000  | 0.000  | 0.021  | 0.000  | 0.000  | 0.000  | 0.000  | 0.000  | 0.000  | 0.000  | 0.000  | 0.000  | 0.000  | 0.000  | 0.000   | 0.000 |
| IgG-exposed antimicrobial peptide 2                   | 8.843  | 0.000  | 0.000 | 0.000  | 0.000  | 0.60   | 0.000  | 0.188  | 0.000  | 0.000  | 0.24   | 0.124  | 0.123  | 0.008  | 0.124  | 0.008  | 0.124  | 0.008  | 0.124  | 0.008  | 0.124  | 0.008  | 0.124   | 0.008 |
| Immunoglobulin lambda-like polypeptide 5              | 8.843  | 0.000  | 0.000 | 0.000  | 0.000  | 0.000  | 0.000  | 0.000  | 0.000  | 5.835  | 2.654  | 0.000  | 0.000  | 0.000  | 7.813  | 0.000  | 0.000  | 0.000  | 0.948  | 20.179 | 3.188  | 11.371 | 133.690 |       |
| Guanine nucleotide-binding protein subunit gamma      | 9.058  | 0.000  | 0.000 | 0.000  | 0.000  | 0.000  | 0.000  | 2.420  | 0.000  | 0.000  | 0.000  | 0.000  | 0.000  | 0.000  | 0.000  | 0.000  | 0.000  | 0.000  | 0.000  | 0.000  | 0.000  | 0.000  | 0.000   | 0.000 |
| Apolipoprotein C-I                                    | 9.332  | 0.872  | 2.625 | 0.770  | 0.000  | 3.232  | 0.000  | 0.000  | 1.588  | 6.954  | 6.172  | 6.472  | 6.646  | 18.530 | 3.725  | 15.283 | 4.883  | 3.969  | 7.992  | 6.652  | 1.597  | 0.000  | 0.000   | 0.000 |
| Putative membrane protein insertion efficiency factor | 9.378  | 0.000  | 0.000 | 0.000  | 0.000  | 0.000  | 0.000  | 0.000  | 0.000  | 0.000  | 0.000  | 0.000  | 0.423  | 0.000  | 0.000  | 0.000  | 0.000  | 0.000  | 0.000  | 0.000  | 0.000  | 0.000  | 0.000   | 0.000 |
| Hepcidin                                              | 9.408  | 0.000  | 0.000 | 0.000  | 0.000  | 0.122  | 0.699  | 0.000  | 0.000  | 0.000  | 0.639  | 1.011  | 1.957  | 1.422  | 1.221  | 1.481  | 1.015  | 1.047  | 0.000  | 0.000  | 1.436  | 1.160  | 0.000   | 0.000 |
| Defensin-5                                            | 10.071 | 0.000  | 0.000 | 0.000  | 0.000  | 0.000  | 0.000  | 0.000  | 0.000  | 0.000  | 0.000  | 0.000  | 0.000  | 0.000  | 0.000  | 0.000  | 0.000  | 0.000  | 0.000  | 0.000  | 0.000  | 0.000  | 0.000   | 0.000 |
| Neutrophil defensin 1                                 | 10.201 | 0.000  | 0.000 | 0.000  | 0.000  | 2.562  | 4.354  | 3.610  | 2.369  | 3.953  | 4.713  | 0.850  | 2.993  | 5.726  | 1.911  | 3.887  | 2.868  | 1.916  | 3.627  | 2.998  | 2.826  | 1.435  | 1.297   | 0.000 |
| Neutrophil defensin 3                                 | 10.245 | 0.000  | 0.000 | 0.000  | 0.000  | 0.000  | 0.469  | 0.000  | 0.000  | 1.863  | 4.576  | 1.110  | 0.000  | 7.552  | 0.000  | 0.000  | 0.000  | 1.746  | 0.000  | 0.000  | 0.000  | 1.429  | 0.591   | 0.000 |
| Stromal cell-derived factor 1                         | 10.666 | 0.000  | 0.000 | 0.000  | 0.000  | 0.030  | 0.000  | 0.000  | 0.000  | 0.000  | 0.036  | 0.000  | 0.000  | 0.000  | 0.000  | 0.000  | 0.000  | 0.000  | 0.000  | 0.000  | 0.000  | 0.000  | 0.000   | 0.000 |
| Ig kappa chain V-III region NG9 (Fragment)            | 10.729 | 0.000  | 0.000 | 0.000  | 0.000  | 0.271  | 0.000  | 0.000  | 0.000  | 0.461  | 0.112  | 0.565  | 0.000  | 0.000  | 0.000  | 0.000  | 0.204  | 0.215  | 0.000  | 0.000  | 0.000  | 0.133  | 0.000   | 0.000 |
| 5S ribosomal protein L30e                             | 10.766 | 0.000  | 0.000 | 0.000  | 0.000  | 0.000  | 0.000  | 0.000  | 0.000  | 0.000  | 0.000  | 0.000  | 0.626  | 0.000  | 0.000  | 0.000  | 0.000  | 0.000  | 0.000  | 0.000  | 0.000  | 0.000  | 0.000   | 0.000 |
| Platelet factor 4                                     | 10.850 | 3.550  | 8.543 | 0.394  | 7.163  | 39.277 | 32.770 | 18.140 | 10.785 | 30.760 | 33.557 | 20.286 | 16.047 | 31.303 | 39.702 | 31.248 | 36.603 | 19.713 | 16.820 | 12.846 | 19.219 | 29.117 | 11.406  | 0.000 |
| Apolipoprotein C-III                                  | 10.852 | 0.890  | 1.401 | 2.441  | 2.340  | 7.331  | 3.461  | 9.648  | 6.444  | 10.925 | 9.537  | 6.373  | 11.706 | 21.120 | 8.915  | 5.769  | 6.661  | 17.421 | 22.594 | 9.764  | 11.448 | 10.268 | 4.367   | 0.000 |
| Apolipoprotein A-II                                   | 11.175 | 56.887 | 6.242 | 20.299 | 70.436 | 7.717  | 23.306 | 19.465 | 61.325 | 16.471 | 22.751 | 6.781  | 16.529 | 8.464  | 7.211  | 5.213  | 9.620  | 32.624 | 37.331 | 27.445 | 21.455 | 24.077 | 18.602  | 0.000 |
| Ig lambda-3 chain C regions                           | 11.238 | 1.205  | 2.666 | 0.167  | 1.007  | 1.509  | 0.000  | 2.597  | 2.791  | 3.169  | 1.466  | 4.879  | 3.484  | 4.862  | 3.134  | 4.620  | 1.505  | 0.327  | 2.037  | 2.046  | 3.886  | 0.358  | 0.000   | 0.000 |
| Apolipoprotein C-II                                   | 11.284 | 0.000  | 0.000 | 0.000  | 0.000  | 0.295  | 0.000  | 0.676  | 1.824  | 0.973  | 0.690  | 0.815  | 3.283  | 0.959  | 0.000  | 0.500  | 1.199  | 4.020  | 0.820  | 2.767  | 0.713  | 0.000  | 0.000   | 0.000 |
| Densinidin                                            | 11.284 | 0.000  | 0.000 | 0.000  | 0.000  | 0.000  | 0.000  | 0.000  | 0.000  | 0.000  | 0.000  | 0.000  | 0.000  | 0.000  | 0.000  | 0.138  | 0.000  | 0.000  | 0.000  | 0.000  | 0.000  | 0.000  | 0.000   | 0.000 |
| Ig lambda-2 chain C regions                           | 11.294 | 0.000  | 0.082 | 0.000  | 0.000  | 2.016  | 2.224  | 2.379  | 5.193  | 0.221  | 0.185  | 2.921  | 1.994  | 2.142  | 0.359  | 3.585  | 4.135  | 1.019  | 1.883  | 2.435  | 2.976  | 4.592  | 3.094   | 0.000 |
| Ig lambda-7 chain C region                            | 11.303 | 0.000  | 0.000 | 0.000  | 0.000  | 0.000  | 0.000  | 0.108  | 0.000  | 0.000  | 0.000  | 0.000  | 0.000  | 0.000  | 0.000  | 0.000  | 0.000  | 0.000  | 0.000  | 0.000  | 0.000  | 0.000  | 0.000   | 0.000 |
| Ig lambda-1 chain C regions                           | 11.348 | 0.000  | 0.000 | 0.000  | 0.000  | 0.000  | 0.000  | 0.000  | 0.000  | 0.000  | 0.000  | 0.000  | 0.000  | 0.000  | 0.000  | 0.000  | 0.000  | 0.000  | 0.000  | 0.000  | 0.000  | 2.027  | 7.833   | 0.210 |
| Ig lambda chain V-III region SH                       | 11.393 | 0.000  | 0.000 | 0.000  | 0.000  | 0.036  | 0.000  | 0.000  | 0.000  | 0.000  | 0.000  | 0.000  | 0.045  | 0.000  | 0.000  | 0.000  | 0.000  | 0.000  | 0.000  | 0.000  | 0.000  | 0.000  | 0.000   | 0.000 |
| Ig lambda chain V-III region NG-58                    | 11.455 | 0.000  | 0.000 | 0.000  | 0.000  | 0.000  | 0.000  | 0.052  | 0.197  | 0.000  | 0.045  | 0.296  | 0.120  | 0.302  | 0.206  | 0.000  | 0.000  | 0.000  | 0.000  | 0.000  | 0.225  | 0.435  | 3.528   | 0.000 |
| Ig lambda chain V-III region BUR                      | 11.506 | 0.000  | 0.000 | 0.000  | 0.000  | 0.000  | 0.000  | 0.000  | 0.000  | 0.000  | 0.000  | 0.000  | 0.000  | 0.000  | 0.000  | 0.143  | 0.000  | 0.000  | 0.000  | 0.000  | 0.340  | 9.122  | 0.000   | 0.000 |
| Ig lambda chain V-IV region HI                        | 11.519 | 0.000  | 0.000 | 0.000  | 0.000  | 0.174  | 0.000  | 0.000  | 0.178  | 0.067  | 0.000  | 0.237  | 0.000  | 0.121  | 0.048  | 0.000  | 0.085  | 0.133  | 0.158  | 0.000  | 0.008  | 0.319  | 0.000   | 0.000 |
| Platelet factor 4 variant                             | 11.553 | 0.000  | 0.000 | 0.000  | 0.000  | 23.962 | 0.000  | 0.000  | 0.000  | 0.000  | 0.000  | 0.000  | 15.173 | 0.000  | 20.440 | 0.000  | 0.000  | 0.000  | 0.000  | 0.000  | 0.000  | 0.000  | 0.000   | 0.000 |
| Ig lambda chain V-II region TRO                       | 11.561 | 0.000  | 0.000 | 0.000  | 0.000  | 0.000  | 0.000  | 0.000  | 0.000  | 0.000  | 0.000  | 0.000  | 0.000  | 0.000  | 0.000  | 0.000  | 0.000  | 0.000  | 0.000  | 0.000  | 0.000  | 0.354  | 3.269   | 0.000 |
| Ig kappa chain C region                               | 11.609 | 1.198  | 3.822 | 0.381  | 0.449  | 4.086  | 7.210  | 12.572 | 23.778 | 8.499  | 3.828  | 17.390 | 6.874  | 2.434  | 13.988 | 12.545 | 4.848  | 4.324  | 0.530  | 3.677  | 3.093  | 10.610 | 10.759  | 0.000 |
| Ig lambda chain V-II region BOH                       | 11.650 | 0.000  | 0.000 | 0.000  | 0.000  | 0.000  | 0.000  | 0.000  | 0.000  | 0.000  | 0.000  | 0.000  | 0.000  | 0.000  | 0.000  | 0.000  | 0.000  | 0.000  | 0.000  | 0.000  | 0.000  | 0.352  | 2.217   | 0.000 |
| Ig lambda chain V-I region WAH                        | 11.729 | 0.000  | 0.000 | 0.000  | 0.000  | 0.000  | 0.000  | 0.000  | 0.000  | 0.000  | 0.000  | 0.000  | 0.000  | 0.000  | 0.000  | 0.000  | 0.000  | 0.000  | 0.000  | 0.000  | 0.000  | 0.000  | 0.000   | 0.000 |
| Ig kappa chain V-II region WAT                        | 11.737 | 0.000  | 0.000 | 0.000  | 0.000  | 0.000  | 0.000  | 0.000  | 0.000  | 0.000  | 0.000  | 0.000  | 0.000  | 0.000  | 0.000  | 0.000  | 0.000  | 0.000  | 0.000  | 0.000  | 0.000  | 0.000  | 0.000   | 0.000 |
| Ig kappa chain V-III region WOL                       | 11.746 | 0.000  | 0.000 | 0.000  | 0.000  | 0.000  | 0.000  | 0.000  | 0.000  | 0.000  | 0.000  | 0.000  | 0.000  | 0.000  | 0.000  | 0.000  | 0.000  | 0.000  | 0.000  | 0.000  | 0.000  | 0.122  | 0.000   | 0.000 |
| Ig kappa chain V-III region SIE                       | 11.775 | 0.000  | 0.000 | 0.000  | 0.000  | 0.000  | 0.000  | 0.000  | 0.000  | 0.000  | 0.000  | 0.000  | 0.000  | 0.000  | 0.000  | 0.000  | 0.000  | 0.000  | 0.000  | 0.000  | 0.000  | 0.122  | 0.000   | 0.000 |
| Ig kappa chain V-III region TI                        | 11.788 | 0.000  | 0.000 | 0.000  | 0.000  | 0.000  | 0.000  | 0.000  | 0.000  | 0.000  | 0.000  | 0.000  | 0.000  | 0.000  | 0.000  | 0.000  | 0.000  | 0.000  | 0.000  | 0.000  | 0.000  | 0.121  | 0.000   | 0.000 |
| Ig kappa chain V-III region GOL                       | 11.830 | 0.000  | 0.000 | 0.000  | 0.000  | 0.000  | 0.000  | 0.000  | 0.293  | 0.281  | 0.000  | 0.000  | 0.000  | 0.000  | 0.061  | 0.000  | 0.000  | 0.000  | 0.000  | 0.000  | 0.000  | 0.121  | 0.000   | 0.000 |
| Ig lambda chain V-III region LOI                      | 11.935 | 0.000  | 0.000 | 0.000  | 0.000  | 0.000  | 0.000  | 0.000  | 0.000  | 0.000  | 0.000  | 0.000  | 0.000  | 0.000  | 0.173  | 0.000  | 0.000  | 0.000  | 0.000  | 0.000  | 0.000  | 0.000  | 0.000   | 0.000 |
| Colipase                                              | 11.954 | 0.000  | 0.000 | 0.000  | 0.000  | 0.041  | 0.000  | 0.000  | 0.000  | 0.000  | 0.000  | 0.000  | 0.000  | 0.000  | 0.000  | 0.000  | 0.000  | 0.000  | 0.000  | 0.000  | 0.000  | 0.000  | 0.000   | 0.000 |
| Ig kappa chain V-IV region Len                        | 12.080 | 0.000  | 0.000 | 0.000  | 0.000  | 0.290  | 0.000  | 0.134  | 0.290  | 0.000  | 0.045  | 0.000  | 0.000  | 0.000  | 0.000  | 0.000  | 0.136  | 0.000  | 0.000  | 0.000  | 0.435  | 17.129 | 0.000   | 0.000 |
| Ig heavy chain V-II region TUR                        | 12.190 | 0.072  | 0.000 | 0.000  | 0.000  | 0.000  | 0.000  | 0.000  | 0.000  | 0.000  | 0.000  | 0.113  | 0.034  | 0.000  | 0.000  | 0.000  | 0.000  | 0.000  | 0.000  | 0.000  | 0.000  | 0.000  | 0.000   | 0.000 |
| REVERSED 5S ribosomal protein L24                     | 12.236 | 0.000  | 0.000 | 0.000  | 0.000  | 0.000  | 0.000  | 0.000  | 0.000  | 0.026  | 0.000  | 0.000  | 0.000  | 0.000  | 0.000  | 0.000  | 0.000  | 0.000  | 0.000  | 0.000  | 0.000  | 0.000  | 0.000   | 0.000 |
| Ig kappa chain V-II region TEW                        | 12.316 | 0.000  | 0.000 | 0.000  | 0.000  | 0.000  | 0.000  | 0.000  | 0.000  | 0.000  | 0.000  | 0.000  | 0.000  | 0.002  | 0.000  | 0.000  | 0.000  | 0.000  | 0.000  | 0.000  | 0.000  | 0.000  | 0.000   | 0.000 |
| Matrix Gla protein                                    | 12.353 | 0.000  | 0.000 | 0.000  | 0.000  | 0.071  | 0.000  | 0.000  | 0.233  | 0.000  | 0.051  | 0.043  | 0.146  | 0.025  | 0.074  | 0.080  | 0.125  | 0.019  | 0.137  | 0.000  | 0.000  | 0.155  | 1.524   | 0.000 |
| Ig heavy chain V-I region EU                          | 12.472 | 0.000  | 0.000 | 0.000  | 0.000  | 0.176  | 0.000  | 0.246  | 0.235  | 0.072  | 0.000  | 0.207  | 0.000  | 0.000  | 0.116  | 0.138  | 0.077  | 0.269  | 0.000  | 0.000  | 0.000  | 0.000  | 0.000   | 0.000 |
| Hepatocyte growth factor-like protein                 | 12.802 | 0.156  | 0.000 | 0.000  | 0.000  | 0.013  | 0.000  | 0.000  |        |        |        |        |        |        |        |        |        |        |        |        |        |        |         |       |









**Table S4.** Observed up and down-regulated proteins with reported cancer biomarker potential.<sup>6</sup>

| <b>Protein</b>                               | <b>Gene</b> | <b>Function</b>               | <b>Cancer biomarker</b>                | <b>Observed tag</b>                          |
|----------------------------------------------|-------------|-------------------------------|----------------------------------------|----------------------------------------------|
| Apolipoprotein C-I                           | APOC1       | Lipid metabolism regulator    | Up-regulated in gastric cancer         | Up-regulated in B-<br>Down-regulated in B+/M |
| Prothrombin                                  | F2          | Coagulation factor            | Up-regulated in cancer with thrombosis | Up-regulated in B+<br>Down-regulated in M    |
| Neutrophil defensin 1                        | DEFA1       | Antimicrobial                 | Up-regulated in colon cancer           | Up-regulated in B+<br>Down-regulated in M    |
| Platelet factor 4 variant                    | PF4V1       | Promotes coagulation          | Up-regulated in cancer                 | Up-regulated in B+                           |
| Inter-alpha trypsin inhibitor heavy chain H1 | ITIH1       | Hyaluronan carrier            | Up-regulated in ovarian cancer         | Up-regulated in M                            |
| Plasma serine protease inhibitor             | SERPINA5    | Serine proteases inactivation | Up-regulated in prostate cancer        | Up-regulated in B+<br>Down-regulated in M    |
| Histidine-rich glycoprotein                  | HRG         | Angiogenesis, Immune system   | Up-regulated in cancer                 | Up-regulated in M                            |

#### 4. Supplementary Figures

**Figure S1.** Particle hydrodynamic diameter of as-synthesized materials as determined in water by DLS (intensity output).

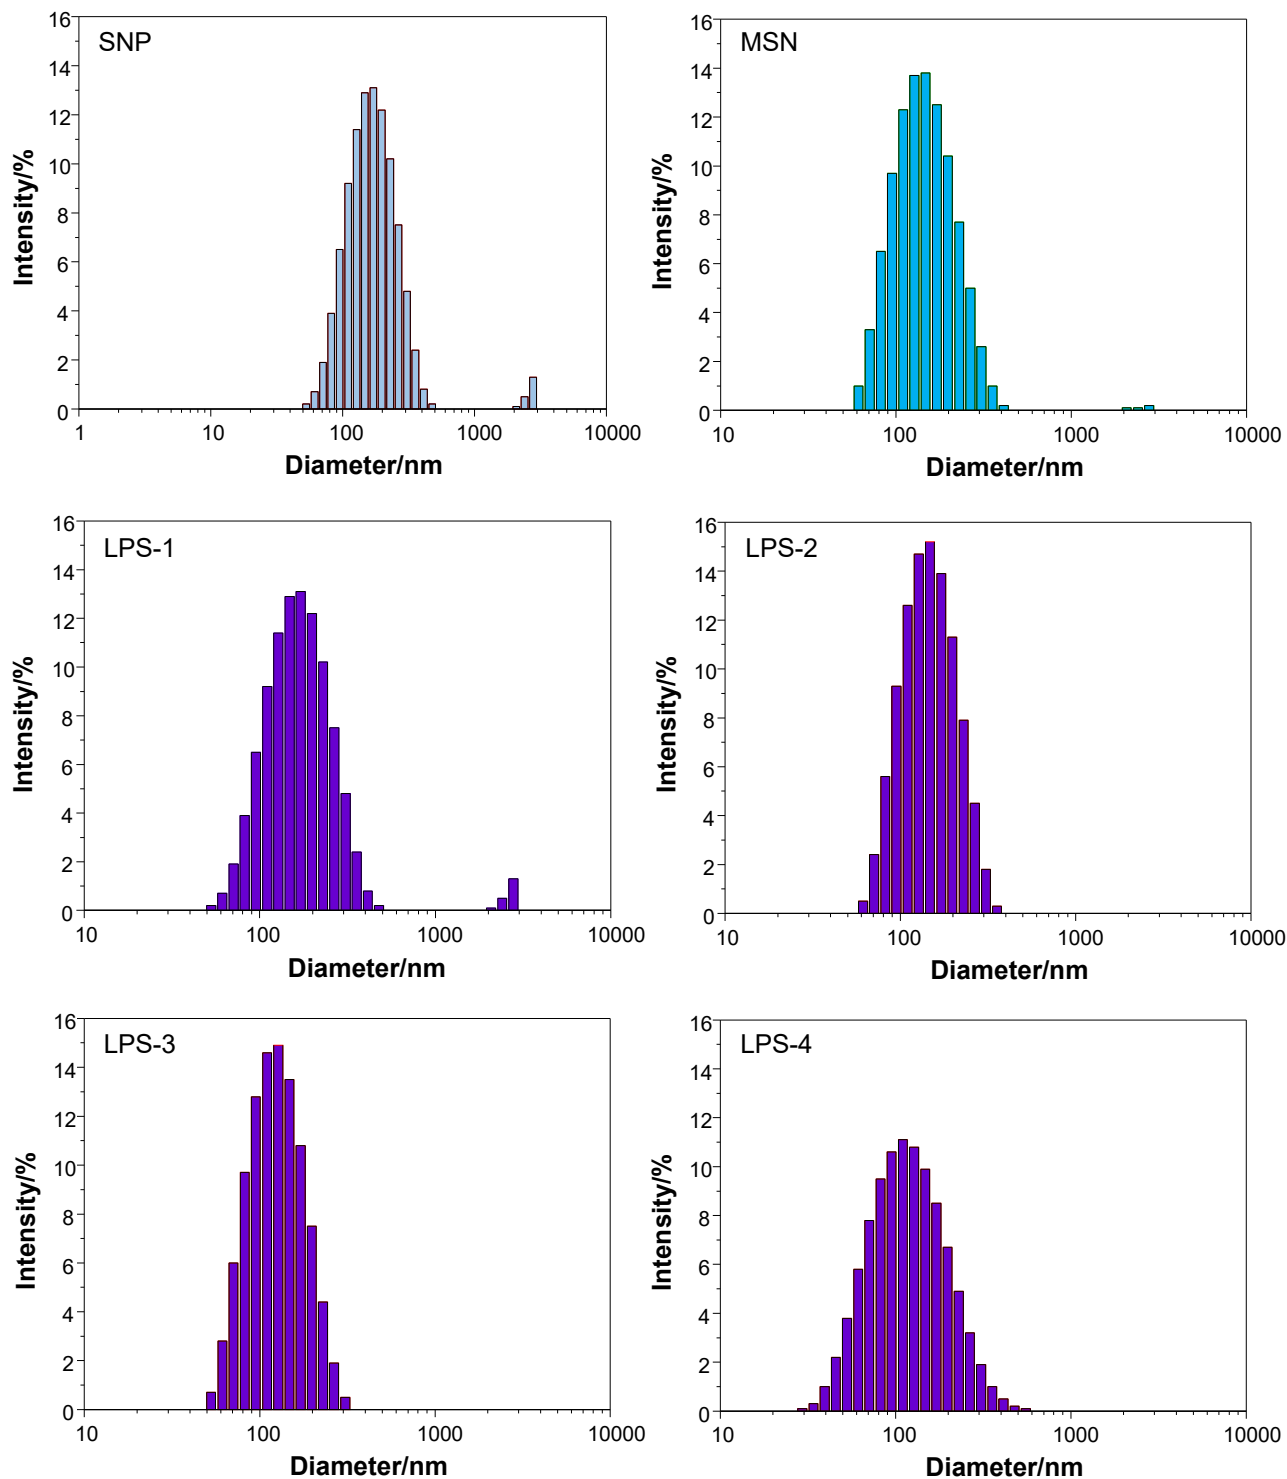

Figure S2. BET N<sub>2</sub> adsorption-desorption isotherms of as-synthesized materials.

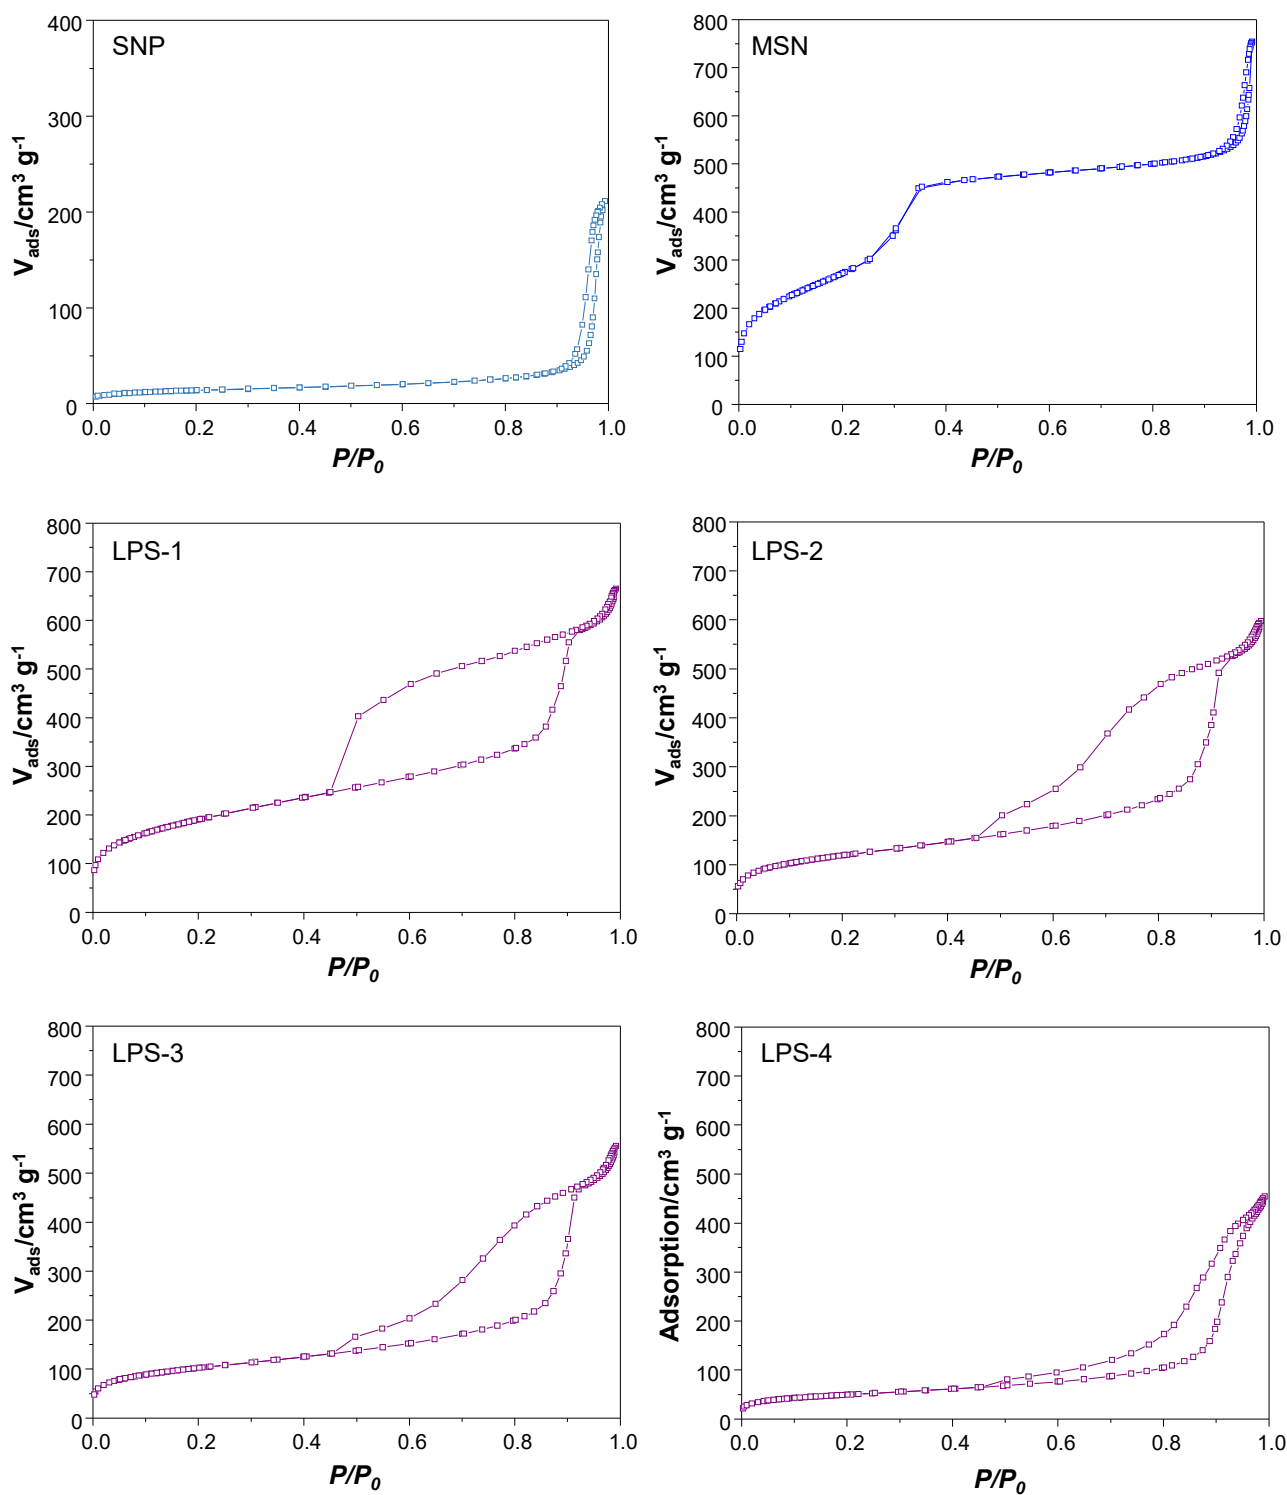

**Figure S3.** Pore size distribution in as-synthesized materials as determined by BJH method. Legend: (□) Pore size as determined by N<sub>2</sub> adsorption isotherms. In the case of LPS materials, these data correspond to internal cavity size distribution. (○) Pore size as determined by desorption isotherms. In the case of LPS materials, these data correspond to pore entrance size distribution.

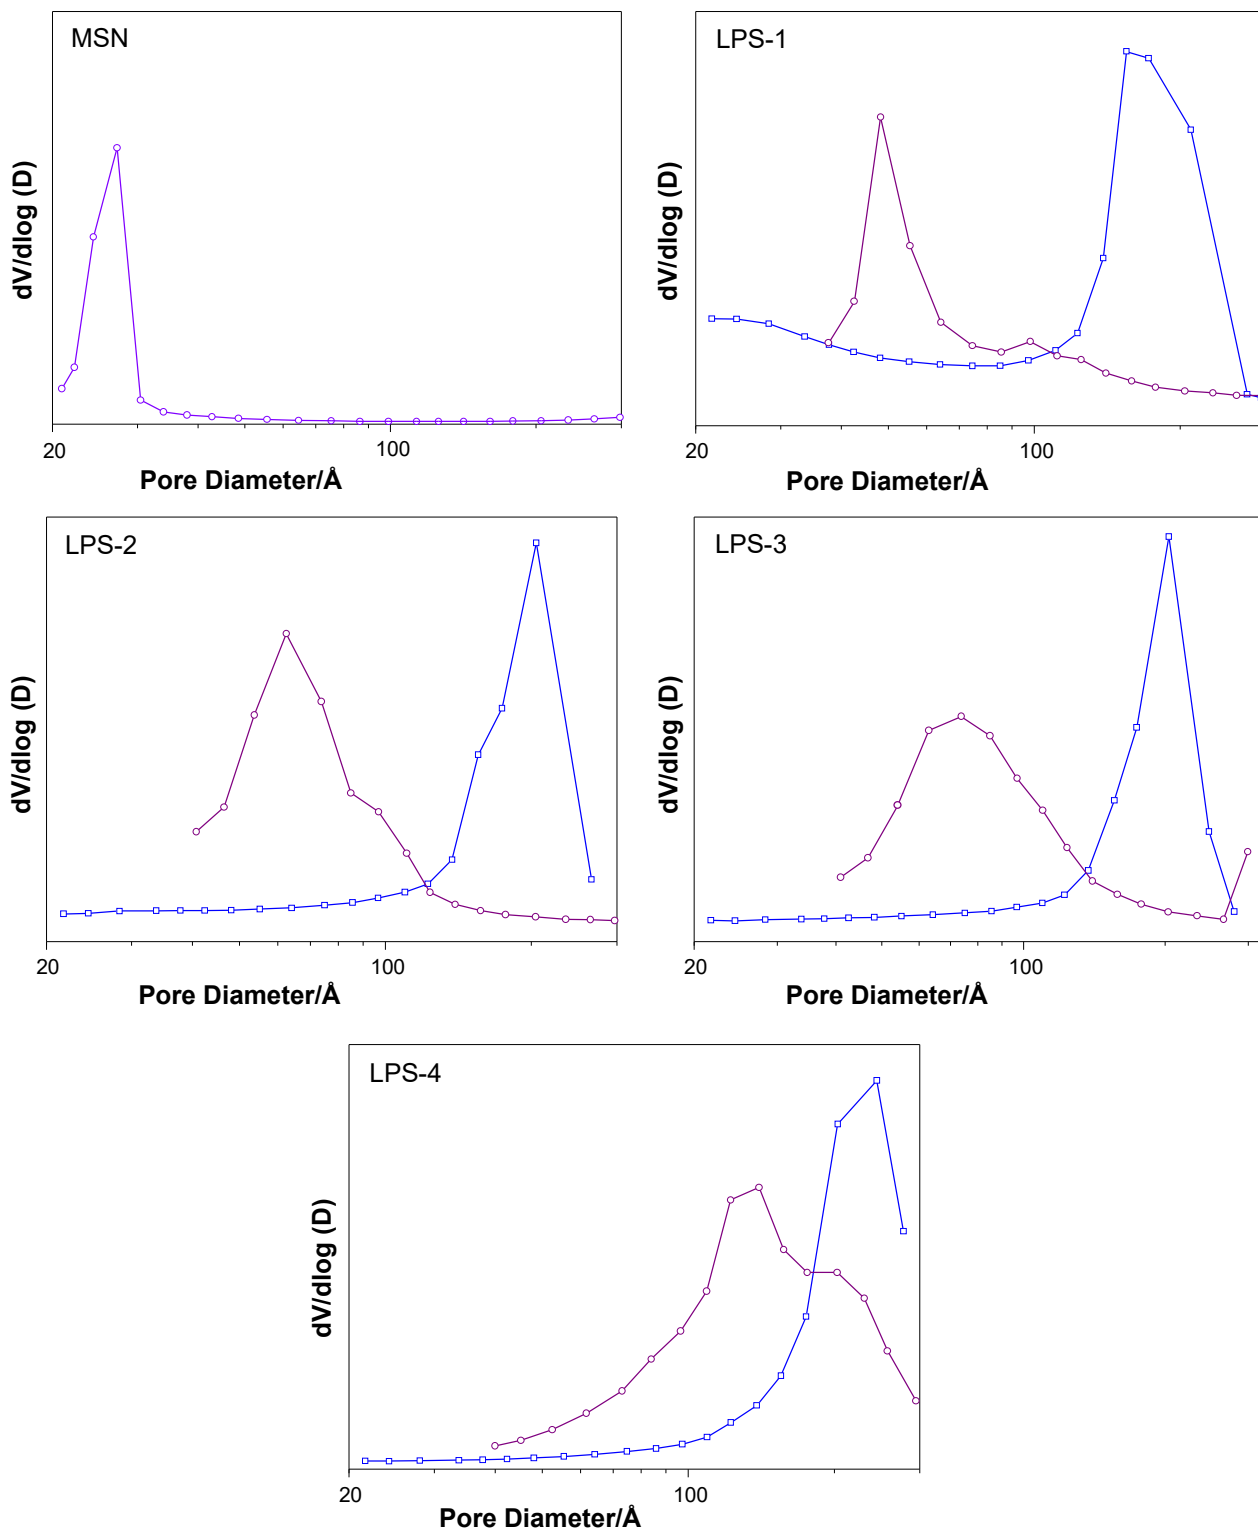

**Figure S4.** SDS-PAGE of isolated corona proteins from silica nanoparticles with variable pore diameter.

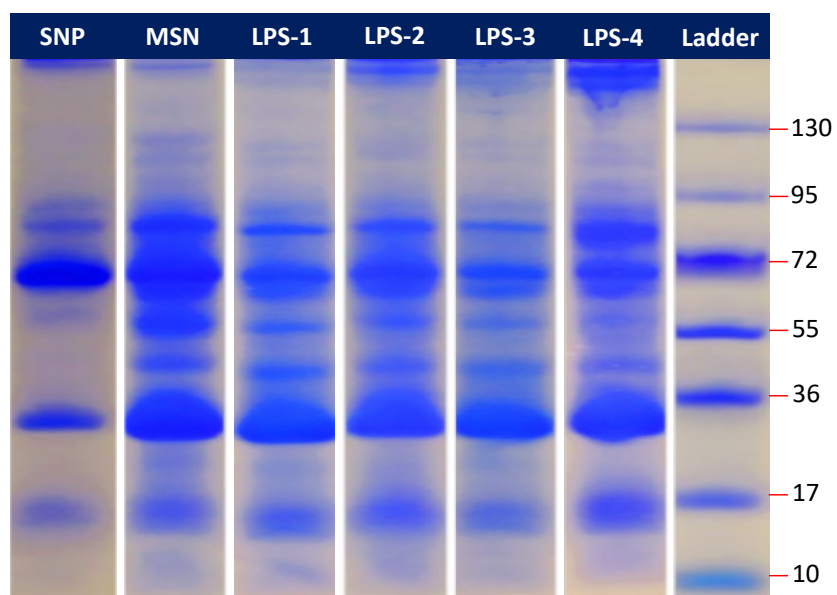

**Figure S5.** Comparison of the weight percent of the protein corona (NSpC x TGA) across the different surface modified MSN with respect to molecular weight (MW). As show, in all cases, low MW proteins composed the highest percentage of the isolated proteome.

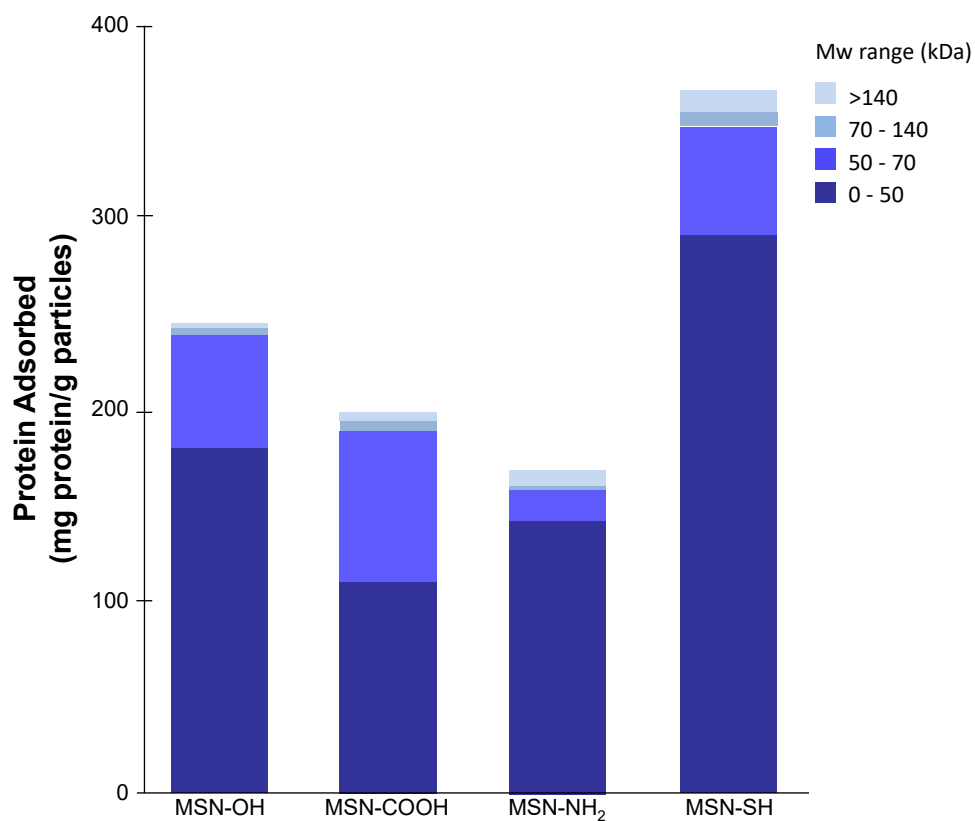



**Figure S6.** Principal Component Analysis (PCA) representation of experimental data. The first three components of the projection are represented in a tri-coordinate system where the different patient groups are clearly split.

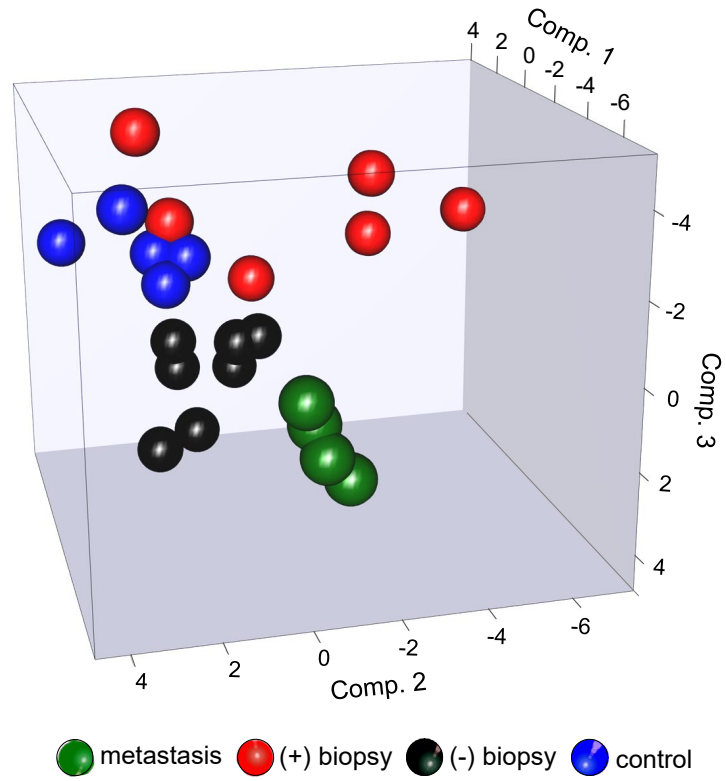

## 5. References

- (1) Nozawa, K.; Gailhanou, H.; Raison, L.; Panizza, P.; Ushiki, H.; Sellier, E.; Delville, J. P.; Delville, M. H. Smart Control of Monodisperse Stöber Silica Particles: Effect of Reactant Addition Rate on Growth Process. *Langmuir* **2005**, *21*, 1516–1523.
- (2) Cai, Q.; Luo, Z. S.; Pang, W. Q.; Fan, Y. W.; Chen, X. H.; Cui, F. Z. Dilute Solution Routes to Various Controllable Morphologies of MCM-41 Silica with a Basic Medium. *Chem. Mater.* **2001**, *13*, 258–263.
- (3) Gao, F.; Botella, P.; Corma, A.; Blesa, J.; Dong, L. Monodispersed Mesoporous Silica Nanoparticles with Very Large Pores for Enhanced Adsorption and Release of DNA. *J. Phys. Chem. B* **2009**, *113*, 1796–1804.
- (4) Clemments, A. M.; Muniesa, C.; Landry, C. C.; Botella, P. Effect of Surface Properties in Protein Corona Development on Mesoporous Silica Nanoparticles. *RSC Adv.* **2014**, *4*, 29134–29138.
- (5) Barrett, E. P.; Joyner, L. G.; Halenda, P. P. The Determination of Pore Volume and Area Distributions in Porous Substances. I. Computations from Nitrogen Isotherms. *J. Am. Chem. Soc.* **1951**, *73*, 373–380.
- (6) Polanski, M.; Anderson, N. L. A List of Candidate Cancer Biomarkers for Targeted Proteomics. *Biomark. Insights* **2007**, *1*, 1–48.
